# Supplementary material for: Short Version of the Inventory of Parental Representations for Attachment Assessment Among Adolescents
Source: Research Square preprint supplement (doi:10.21203/rs.3.rs-461237/v1), 2021-04-27
Supplement: Supplementary file 1 [file b9c1f35cb721ed6724023fb3.docx]

Appendix 1. Original version of the Inventory of Parental Representations, initial French translation and adapted French version.

| Item | **Original version** | **Initial French translation** | **Adapted French version** |
| --- | --- | --- | --- |
| 1 | doesn’t understand me | ne me comprend pas | ne me comprend pas |
| 2 | I worry about him | Je me fais du souci pour lui | Je me fais du souci pour mon père |
| 3 | is the best father of the world | est le meilleur père du monde | est le meilleur père du monde |
| 4 | helps me do the things I want to do | m'aide à faire les choses que je veux faire | m'aide à faire les choses que je veux faire |
| 5 | I am very much like my father* | Je suis vraiment comme mon père | Je suis vraiment comme mon père |
| 6 | lets me chose for myself | me laisse choisir pour moi-même | me laisse faire mes propres choix |
| 7 | we like the same things* | Nous aimons les mêmes choses | Nous aimons les mêmes choses |
| 8 | has too little confidence in me | a trop peu confiance en moi | a trop peu confiance en moi |
| 9 | expects me to be perfect | attend de moi que je sois parfait(e) | attend de moi que je sois parfait(e) |
| 10 | needs me | a besoin de moi | a besoin de moi |
| 11 | sacrifices a lot for me | sacrifie beaucoup de choses pour moi | sacrifie beaucoup de choses pour moi |
| 12 | is jealous and angry* | est jaloux et en colère | est jaloux et en colère par rapport à moi** |
| 13 | likes to see me fail | aime me voir échouer | aime me voir échouer |
| 14 | doesn't approve of my dating | n'approuve pas que je sorte avec des filles (garçons) | n'approuve pas mes petits copains / petites copines** |
| 15 | wishes I were perfect | souhaite que je sois parfait(e) | souhaiterait que je sois parfait(e)** |
| 16 | is quite self-centrered* | est plutôt égocentrique | est plutôt égocentrique (pense à lui avant les autres)** |
| 17 | does things to humiliate me | fait des choses pour m'humilier | fait des choses pour m'humilier |
| 18 | doesn't give me any space* | ne me laisse aucun espace | ne me laisse aucun espace |
| 19 | is too concerned with my intimate relationships | se préoccupe trop de mes relations intimes | se préoccupe trop de mes relations intimes |
| 20 | lets people take advantage of him* | laisse les gens profiter de lui | laisse les gens profiter de lui |
| 21 | is a pushover* | se laisse facilement avoir | se laisse marcher dessus |
| 22 | can be revengeful* | peut être "revanchard" | peut être rancunier** |
| 23 | we have a perfect understanding* | Nous avons une parfaite compréhension mutuelle | Nous nous comprenons parfaitement** |
| 24 | places his needs first* | fait passer ses besoins en premier | fait passer ses besoins en premier |
| 25 | is disappointed in me | Je le déçois | Je le déçois |
| 26 | thinks he is always right | pense qu'il a toujours raison | pense qu'il a toujours raison |
| 27 | is too protective of me* | me protège trop | me protège trop |
| 28 | can’t stand up to me | ne peut pas me tenir tête | ne peut pas me tenir tête |
| 29 | I can easily take advantage of him* | Je peux facilement profiter de lui | Je peux facilement profiter de lui |
| 30 | I feel protective of my father | Je veux protéger mon père | J'ai l'impression de devoir protéger mon père** |
| 31 | makes me feel special | me donne l'impression d'être unique au monde | me donne l'impression d'être unique** |
| 32 | doesn't give me any privacy* | ne me laisse aucune intimité | ne me laisse aucune intimité |
| 33 | I want him to be proud of me* | Je veux qu'il soit fier de moi | Je veux qu'il soit fier de moi |
| 34 | I hope I can fulfill his dreams for me* | J'espère pouvoir réaliser les rêves qu'il a pour moi | J'espère pouvoir réaliser les rêves qu'il a pour moi |
| 35 | is competitive with me | est en rivalité avec moi | entre en compétition avec moi** |
| 36 | is more interested in his work than her family | est plus intéressé par son travail que par sa famille | est plus intéressé par son travail que par sa famille |
| 37 | is always there when I need him | est toujours là quand j'ai besoin de lui | est toujours là quand j'ai besoin de lui |
| 38 | I wish I could make him happy* | J'aimerais pouvoir le rendre heureux | J'aimerais pouvoir le rendre heureux |
| 39 | wants me to be independent | veut que je sois indépendant(e) | veut que je sois indépendant(e) |
| 40 | I hate to let him down* | Je déteste le décevoir | Je déteste le décevoir |
| 41 | doesn't react when I’m in trouble | ne réagit pas quand j'ai des ennuis | ne réagit pas quand j'ai des ennuis |
| 42 | is not the kind of person I want to be | n'est pas le genre de personne que je veux être | n'est pas le genre de personne que je veux être |
| 43 | accepts my decisions | accepte mes décisions | accepte mes décisions |
| 44 | trusts me | me fait confiance | me fait confiance |
| 45 | I worry about him dying* | L'idée qu'il puisse mourir m'inquiète | L'idée qu'il puisse mourir m'inquiète |
| 46 | can't stop me | ne peut pas m'arrêter | ne peut pas m'arrêter |
| 47 | likes me to stay home* | aime que je reste à la maison | préfère que je reste à la maison** |
| 48 | doesn't like my friends | n'aime pas mes amis | n'aime pas mes amis |
| 49 | thinks I can’t take care of myself | pense que je ne sais pas prendre soins de moi | pense que je ne sais pas prendre soins de moi |
| 50 | repects my point of view | respecte mon point de vue | respecte mon point de vue |
| 51 | I am very proud of him | Je suis très fière de lui | Je suis très fière de lui |
| 52 | is very proud of me | est très fier de moi | est très fier de moi |
| 53 | seems to avoid problems | semble éviter d'aborder les problèmes | semble éviter d'aborder les problèmes |
| 54 | seems to be independent and helpless | semble être dépendant et sans défense | J'ai l'impression que mon père a besoin d'aide et qu'il est sans défense** |
| 55 | I feel like a burden to him | J'ai l'impression d'être un fardeau pour lui | J'ai l'impression d'être un fardeau pour lui |
| 56 | won't let me live my life | ne me laisse pas vivre ma vie | ne me laisse pas vivre ma vie |
| 57 | likes me as a person | m'aime en tant que personne | m'aime en tant que personne |
| 58 | isn’t a strong person | n'est pas une personne solide | n'est pas une personne solide |
| 59 | encourages me to make my own decisions | m'encourage à prendre mes propres décisions | m'encourage à prendre mes propres décisions |
| 60 | accepts that we may disagree | accepte que nous puissions ne pas être du même avis | accepte que nous puissions ne pas être du même avis |
| 61 | wants me to succeed at what I choose | veut que je réussisse ce que j'entreprends | veut que je réussisse ce que j'entreprends |
| 62 | accepts our differences | accepte nos différences | accepte nos différences |

Legend : *: if the item belongs to the revised IPR version proposed by the authors.

**: if the item was adapted during the qualitative work process.
